# Supplementary material for: Microglia contribute to the propagation of Aβ into unaffected brain tissue
Source: PubMed Central journal article supplement (PMC8737330; doi:10.1038/s41593-021-00951-0), 2021-11-22
Supplement: 41593_2021_951_MOESM1_ESM.pdf [file 41593_2021_951_MOESM1_ESM.pdf]

---

**Supplementary information**

---

**Microglia contribute to the propagation of A $\beta$  into unaffected brain tissue**

---

In the format provided by the authors and unedited

## **Microglia contribute to the propagation of A $\beta$ into unaffected brain tissue**

Paolo d'Errico, Stephanie Ziegler-Waldkirch, Vanessa Aires, Philippe Hoffmann, Charlotte Mezö, Daniel Erny, Laura Sebastian Monasor, Sabine Liebscher, Vidhya M Ravi, Kevin Joseph, Oliver Schnell, Katrin Kierdorf, Ori Staszewski, Sabina Tahirovic, Marco Prinz and Melanie Meyer-Luehmann\*

\*Corresponding author : [melanie.meyer-luehmann@uniklinik-freiburg.de](mailto:melanie.meyer-luehmann@uniklinik-freiburg.de)

### **This PDF file includes:**

Supplementary Data Fig. 1 to 3

Captions for Supplementary Videos S1 to S6

### **Additional supplementary material for this manuscript includes the following:**

Supplementary Videos S1 to S6

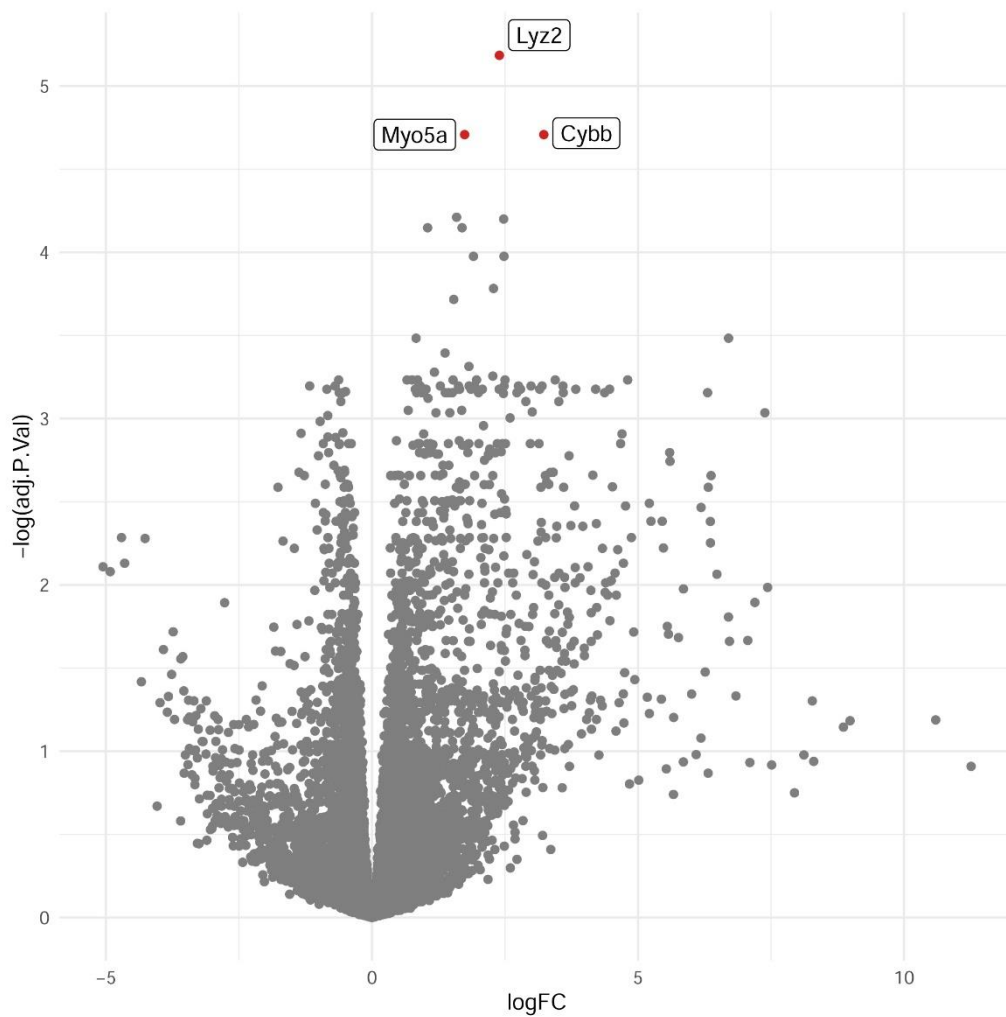

**Supplementary Figure 1. Volcano plot of differential gene expression analysis results.** Labeled and red colored genes are significantly dysregulated between graft and control tissue at a multiple testing adjusted  $p < 0.01$ . Differentially expressed genes were determined using the Limma-voom package in R.

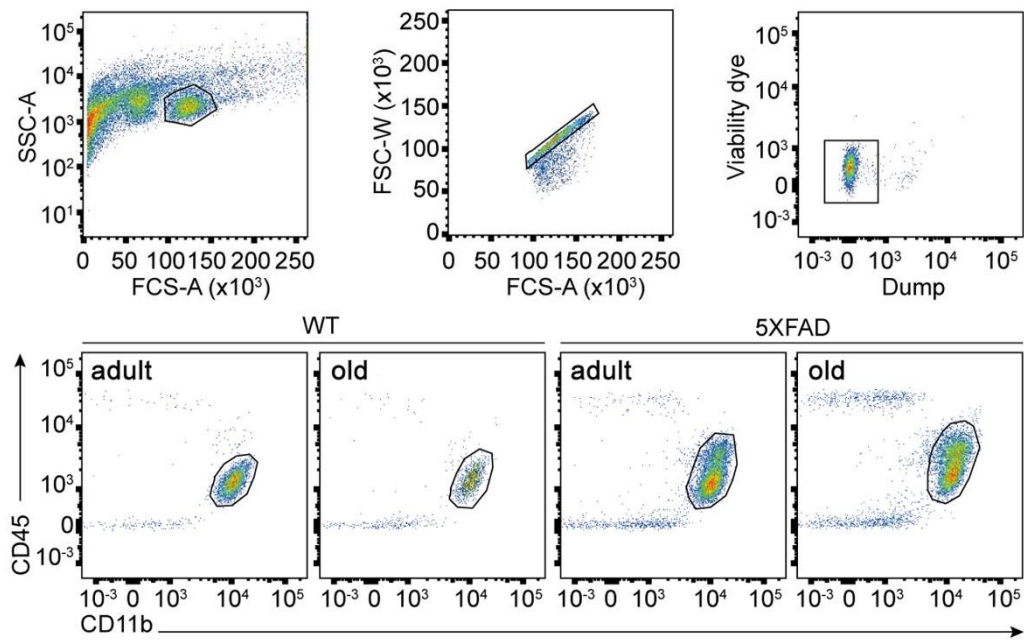

**Supplementary Figure 2. FACS gating strategy.** Gating strategy for flow cytometric analysis of single viable CD11b<sup>+</sup> CD45<sup>lo</sup> methoxy-X04<sup>-</sup> and single viable CD11b<sup>+</sup> CD45<sup>lo</sup> methoxy-X04<sup>+</sup> microglia from adult and old WT and 5xFAD mice.

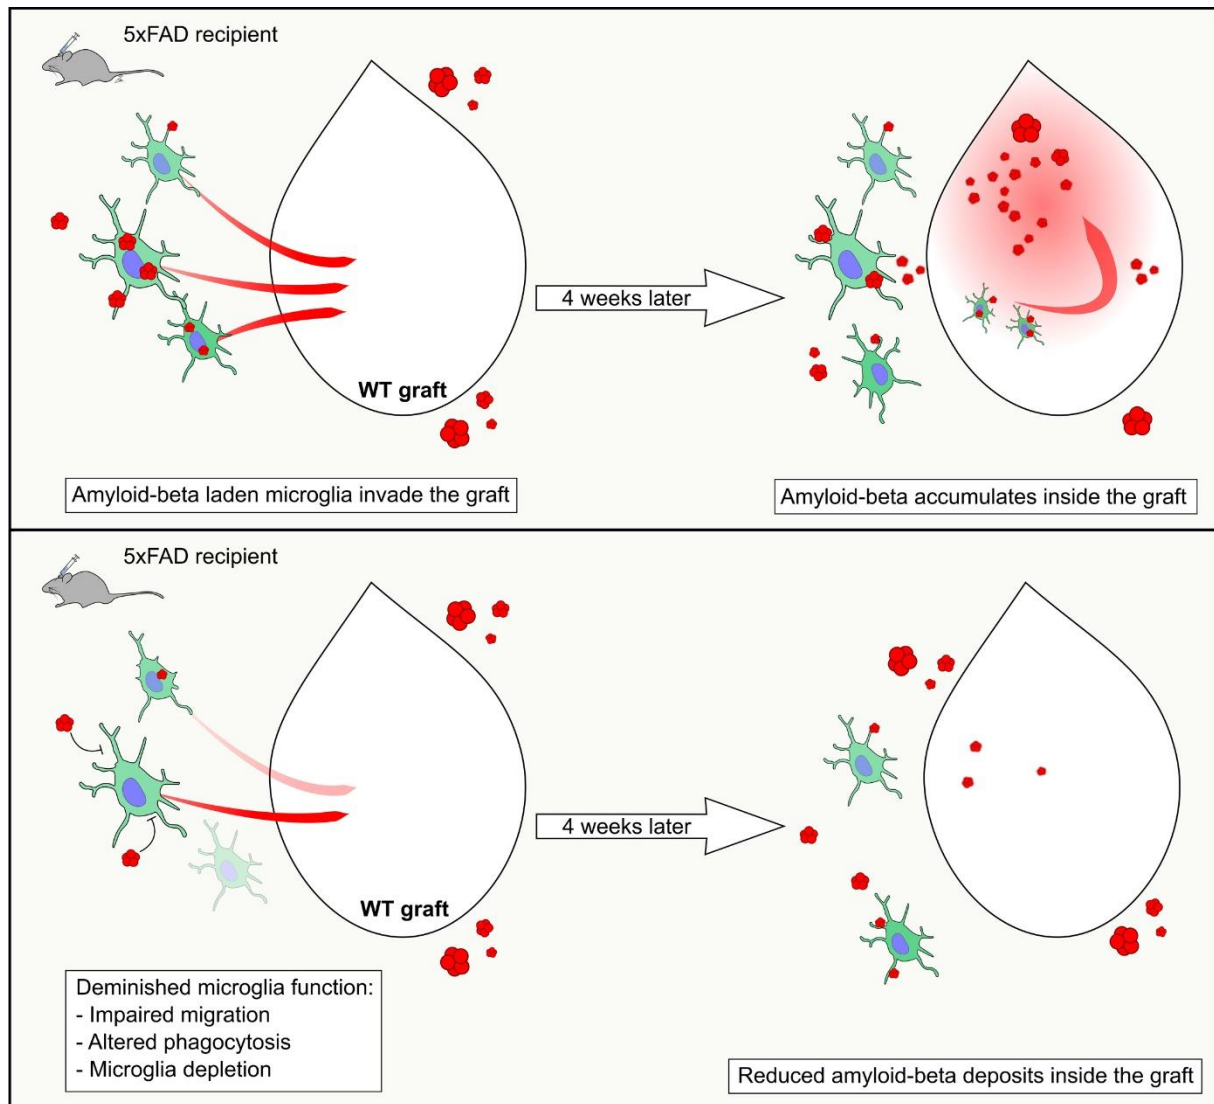

**Supplementary Figure 3. Schematic overview of A $\beta$  propagation involving microglia.**

Upper panel: Host microglia containing A $\beta$  invade the WT graft in 5xFAD recipient mice leading to A $\beta$  accumulation within the transplant. Lower panel: Manipulation of microglial function such as migration and phagocytosis or their elimination is accompanied by a reduction of A $\beta$  load in the WT graft.

### **Supplementary Videos 1-6:**

**Video 1:** Video file showing microglia *in vivo* under resting state condition in an Irf8<sup>+/-</sup> mouse. Scale bar, 10  $\mu$ m.

**Video 2:** Video file showing microglia *in vivo* under resting state condition in an Irf8<sup>-/-</sup> mouse. Scale bar, 10  $\mu$ m.

**Video 3:** Video file showing microglial responses to a localized laser-induced injury *in vivo* in an Irf8<sup>+/-</sup> mouse. Scale bar, 15  $\mu$ m.

**Video 4:** Video file showing microglial responses to a localized laser-induced injury *in vivo* in an Irf8<sup>-/-</sup> mouse. Scale bar, 15  $\mu$ m.

**Video 5:** Video file showing an A $\beta$ -containing microglial cell moving towards the lesion. Scale bar, 20  $\mu$ m.

**Video 6:** Video file showing A $\beta$ -containing microglia moving towards the lesion. Scale bar, 20  $\mu$ m.
