# Supplementary material for: Microglia contribute to the propagation of Aβ into unaffected brain tissue
Source: PubMed Central journal article supplement (PMC8737330; doi:10.1038/s41593-021-00951-0), 2021-11-22

# Source Data

## Extended Data Figure 2

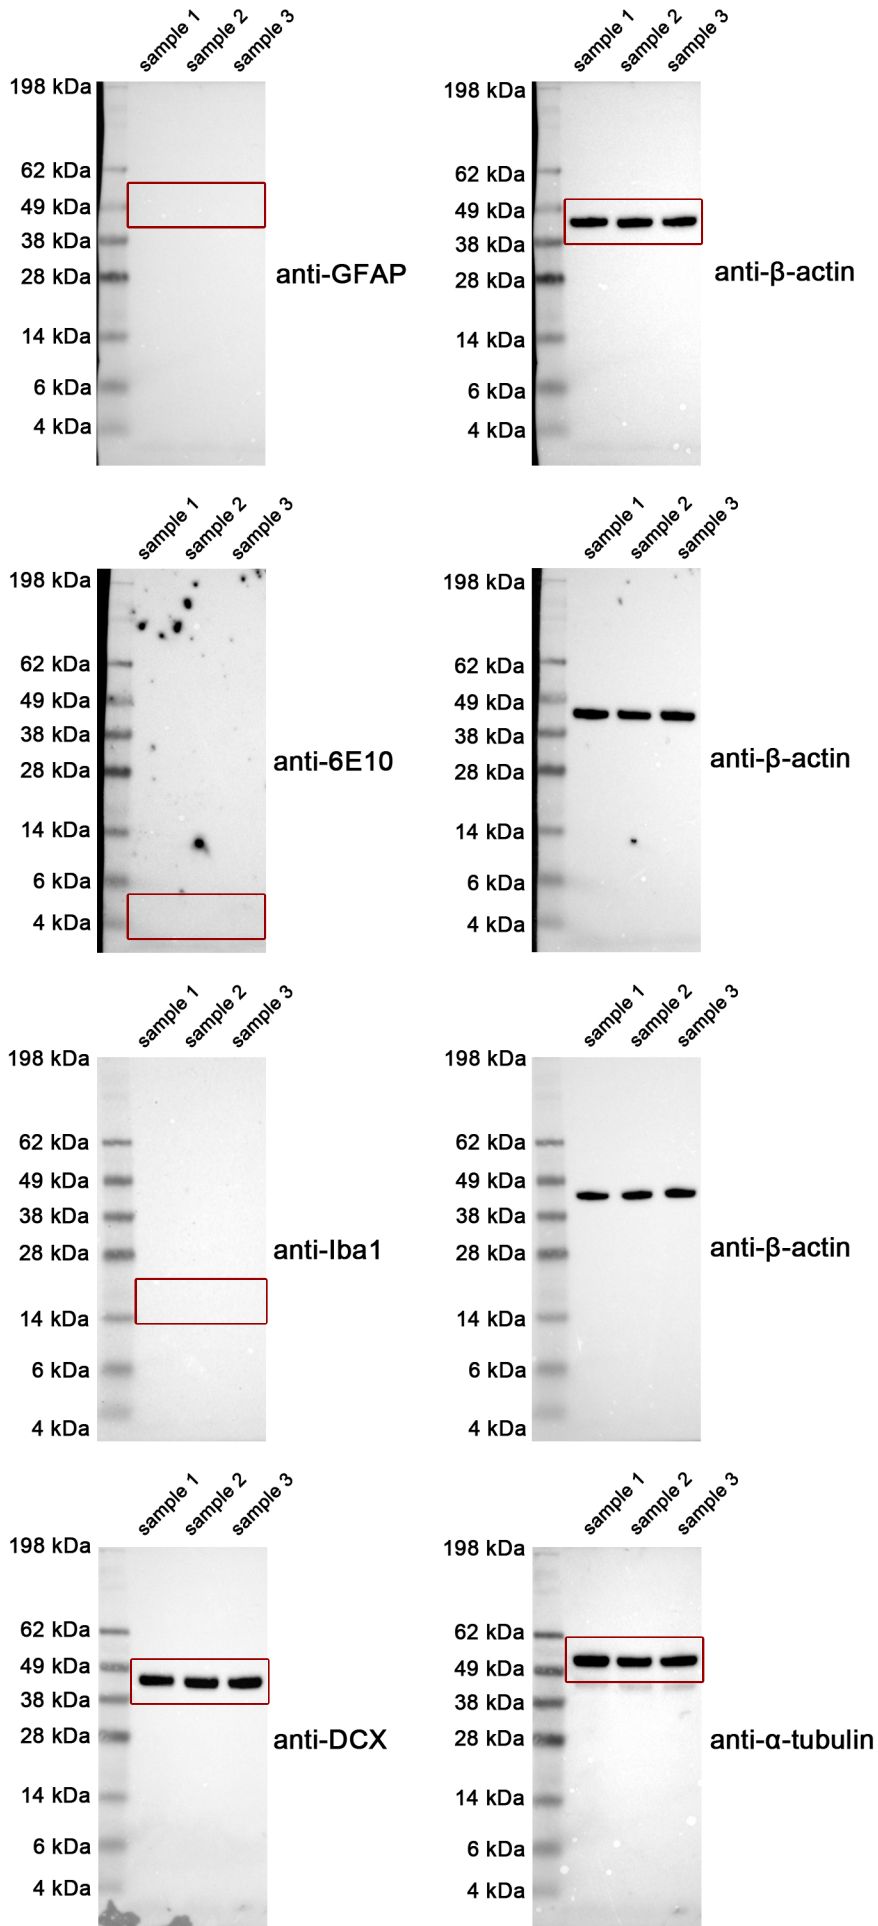

Supplement: 41593_2021_951_MOESM13_ESM.pdf [file 41593_2021_951_MOESM13_ESM.pdf]
